# Supplementary material for: Nutrigenomics of Dietary Lipids
Source: MDPI journal article supplement (doi:10.3390/antiox10070994), 2021-06-22
Supplement: s1 [file s1]

**Table S1: The impact of HFD rich in saturated fats on gut microbiota composition in animals. Most significant and relevant changes are reported.**

| Ref. | Model | Lipid source | $\alpha$ -Diversity | Phylum     |               |                |                | Family          |                 |               |                     |                |                     |                |                    | Genus                  |                      |                    |                         |                  |                     |
|------|-------|--------------|---------------------|------------|---------------|----------------|----------------|-----------------|-----------------|---------------|---------------------|----------------|---------------------|----------------|--------------------|------------------------|----------------------|--------------------|-------------------------|------------------|---------------------|
|      |       |              |                     | Firmicutes | Bacteroidetes | Proteobacteria | Actinobacteria | Ruminococcaceae | Lachnospiraceae | Rikenellaceae | Desulfovibrionaceae | Bacteroidaceae | Erysipelotrichaceae | Prevotellaceae | Enterobacteriaceae | <i>Bifidobacterium</i> | <i>Lactobacillus</i> | <i>Allobaculum</i> | <i>Clostridium</i> spp. | <i>Bilophila</i> | <i>Turicibacter</i> |
| 1    | mice  | Palm oil     | /                   | ↑          | ↓             | ↑              | ↓              |                 | ↑               |               |                     | ↓              | ↑                   |                |                    |                        |                      |                    |                         |                  |                     |
| 2    | mice  | Lard         | /                   |            |               |                |                |                 |                 |               | ↑                   |                |                     |                |                    | ↓                      |                      |                    |                         | ↑                |                     |
| 3    | mice  | SFA          | /                   |            |               |                |                |                 | ↑               |               |                     |                | ↑                   |                |                    | ↓                      | ↑                    | ↓                  |                         | ↑                |                     |
| 4    | mice  | Palm oil     | ↓                   | ↑          | ↓             |                |                |                 |                 |               |                     |                |                     |                |                    |                        |                      |                    | ↑                       |                  |                     |
| 5    | mice  | Milk fats    | /                   | ↑          | ↓             | ↑              |                |                 |                 |               |                     |                |                     |                |                    |                        |                      |                    |                         |                  |                     |
| 6    | mice  | HFD          | /                   |            |               |                |                |                 |                 |               |                     |                |                     |                | ↓                  | ↓                      |                      |                    | ↑                       |                  |                     |
| 7    | mice  | butter       | ↓                   |            | ↓             |                |                |                 |                 |               | ↑                   |                |                     |                |                    |                        | ↑                    |                    |                         |                  |                     |
| 8    | mice  | Lard         | ↑                   |            |               |                |                | ↑               | ↓               | ↓             | ↑                   |                |                     |                |                    |                        |                      |                    |                         |                  |                     |
| 8    | mice  | Palm oil     | ↑                   |            |               |                |                | ↑               | ↑               | ↓             | ↑                   |                |                     |                |                    |                        |                      |                    |                         |                  |                     |
| 9    | mice  | HFD          | /                   | ↑          | ↓             | ↓              |                | ↑               |                 | ↑             |                     | ↓              |                     | ↓              | ↑                  | ↓                      |                      |                    |                         |                  |                     |
| 10   | mice  | HFD          | ↓                   | ↑          | ↓             | ↑              |                | ↑               | ↑               |               |                     |                |                     |                |                    | ↓                      |                      |                    |                         |                  |                     |
| 11   | mice  | HFD          | /                   |            |               |                |                |                 |                 |               |                     | ↓              |                     |                | ↑                  | ↓                      |                      | ↓                  | ↑                       |                  | ↑                   |

|    |      |              |   |   |   |   |  |  |   |  |  |  |   |   |  |   |   |   |   |  |  |
|----|------|--------------|---|---|---|---|--|--|---|--|--|--|---|---|--|---|---|---|---|--|--|
| 12 | hens | HFD          | / | ↑ | ↓ |   |  |  |   |  |  |  | ↑ |   |  |   |   |   |   |  |  |
| 13 | rats | HFD          | ↓ |   |   |   |  |  |   |  |  |  |   | ↑ |  |   |   |   |   |  |  |
| 14 | mice | Coconut oil  | / | ↑ | ↓ |   |  |  |   |  |  |  |   |   |  | ↑ | ↑ | ↑ | ↑ |  |  |
| 15 | mice | Rapeseed oil | / | ↓ | ↑ | ↓ |  |  | ↓ |  |  |  |   |   |  |   | ↓ |   |   |  |  |
| 16 | rats | Coconut oil  | ↓ | ↓ | ↑ |   |  |  |   |  |  |  |   |   |  | ↑ |   | ↑ |   |  |  |

/ no significant difference or not analysed; ↑ increase; ↓ decrease

**Table S2: The impact of TFA (trans fatty acids) on gut microbiota composition in animals. Most significant and relevant changes are reported.**

| Ref. | Model | Lipid source             | $\alpha$ -diversity | Phylum     |               |                |                | Family          |                 |                 |               |                |                     |                  | Genus                     |
|------|-------|--------------------------|---------------------|------------|---------------|----------------|----------------|-----------------|-----------------|-----------------|---------------|----------------|---------------------|------------------|---------------------------|
|      |       |                          |                     | Firmicutes | Bacteroidetes | Proteobacteria | Actinobacteria | Deferribacteres | Ruminococcaceae | Lachnospiraceae | Rikenellaceae | Bacteroidaceae | Desulfovibrionaceae | Lactobacillaceae | <i>Lactobacillus</i> spp. |
| 17   | mice  | hydrogenated soybean oil | ↓                   |            | ↓             | ↑              | ↑              | ↓               | ↓               | ↓               | ↓             | ↓              | ↑                   | ↑                | ↑                         |
| 18   | rats  | hydrogenated soybean oil | /                   | ↑          | ↓             | ↑              |                |                 |                 |                 |               |                |                     |                  |                           |

/ no significant difference or not analysed; ↑ increase; ↓ decrease

Table S3: The impact of MUFA (monounsaturated fatty acids) on gut microbiota composition in animals. Most significant and relevant changes are reported.

| Ref. | Model | Lipid source         | $\alpha$ -diversity | Phylum     |               |                |                | Family          |                 |                     |                | Genus                       |                           |                         |
|------|-------|----------------------|---------------------|------------|---------------|----------------|----------------|-----------------|-----------------|---------------------|----------------|-----------------------------|---------------------------|-------------------------|
|      |       |                      |                     | Firmicutes | Bacteroidetes | Proteobacteria | Actinobacteria | Ruminococcaceae | Lachnospiraceae | Erysipelotrichaceae | Prevotellaceae | <i>Bifidobacterium</i> spp. | <i>Lactobacillus</i> spp. | <i>Clostridium</i> spp. |
| 1    | mice  | Olive oil            | /                   | ↑          | ↓             | ↓              | ↓              |                 |                 | ↑                   |                |                             |                           |                         |
| 7    | mice  | Olive oil            | ↓                   |            |               |                |                |                 |                 | ↑                   | ↑              |                             |                           | ↑                       |
| 19   | rats  | Olive oil            | ↑                   | ↑          | ↓             |                | ↓              | ↑               | ↑               |                     |                |                             | ↑                         |                         |
| 20   | mice  | Oleic acid compounds | /                   | ↓          | ↑             |                |                |                 |                 |                     |                | ↑                           | ↓                         |                         |
| 4    | mice  | Olive oil            | /                   | ↓          | ↑             |                |                |                 |                 |                     |                |                             |                           | ↓                       |

/ no significant difference or not analysed; ↑ increase; ↓ decrease

**Table S4: The impact of PUFA-n-3 (polyunsaturated fatty acids-omega3) on gut microbiota composition in animals. Most significant and relevant changes are reported.**

| Ref. | Model | Lipid source      | $\alpha$ -diversity | Phylum     |               |                |                | Family          |              |                |               |                |                    |                    |                  | Genus                  |                           |                    |                     |                         |                    |                  |                    |                    |  |
|------|-------|-------------------|---------------------|------------|---------------|----------------|----------------|-----------------|--------------|----------------|---------------|----------------|--------------------|--------------------|------------------|------------------------|---------------------------|--------------------|---------------------|-------------------------|--------------------|------------------|--------------------|--------------------|--|
|      |       |                   |                     | Firmicutes | Bacteroidetes | Proteobacteria | Actinobacteria | Deltaproteobact | Ruminococcae | Lachnospiracea | Rikenellaceae | Bacteroidaceae | Enterobacteriaceae | Blfidobacteriaceae | Erysipelotrichac | <i>Bifidobacterium</i> | <i>Lactobacillus</i> spp. | <i>Allobaculum</i> | <i>Turicibacter</i> | <i>Clostridium</i> spp. | <i>Akkermansia</i> | <i>Bilophila</i> | <i>Helicoacter</i> | <i>Pseudomonas</i> |  |
| 21   | mice  | n-3               | /                   |            |               |                |                |                 |              |                |               |                |                    |                    |                  | ↑                      | ↑                         |                    |                     |                         |                    |                  |                    |                    |  |
| 1    | mice  | Flaxseed/fish oil | ↑                   |            |               | ↓              | ↑              |                 | ↑            | ↑              |               | ↓              |                    | ↑                  | ↑                | ↑                      |                           | ↑                  |                     |                         |                    |                  |                    |                    |  |
| 22   | mice  | Fish oil          | /                   | ↓          |               |                |                |                 |              |                |               |                |                    |                    |                  |                        |                           |                    |                     |                         |                    | ↓                | ↓                  |                    |  |
| 23   | mice  | Fish oil          | ↓                   |            | ↓             |                | ↑              | ↑               |              |                |               |                |                    |                    |                  | ↑                      | ↑                         |                    |                     | ↑                       | ↑                  | ↑                |                    |                    |  |
| 3    | mice  | n-3               | /                   |            |               |                |                |                 |              |                |               |                |                    |                    |                  | ↑                      | ↑                         | ↑                  | ↑                   | ↑                       | ↓                  | ↓                |                    |                    |  |
| 24   | mice  | n-3               | ↓                   | ↓          | ↑             |                |                |                 |              |                |               | ↓              |                    |                    |                  | ↑                      |                           |                    |                     |                         |                    |                  |                    |                    |  |
| 20   | mice  | EPA/DHA           | /                   | ↑          |               |                |                |                 |              |                |               |                |                    |                    |                  | ↑                      | ↑                         |                    |                     |                         |                    |                  |                    |                    |  |
| 25   | Rats  | Low n-6/n-3       | ↑                   |            |               |                | ↓              |                 |              |                |               |                |                    |                    |                  |                        |                           | ↑                  |                     |                         |                    |                  |                    |                    |  |

/ no significant difference or not analysed; ↑ increase; ↓ decrease

**Table S5: The impact of PUFA-n-6 (polyunsaturated fatty acids-omega6) on gut microbiota composition in animals. Most significant and relevant changes are reported.**

| Ref. | Model        | Lipid source  | $\alpha$ -diversity | Phylum     |               |                |                | Family          |                 |               |                |                     |                |                    | Genus                       |                           |                    |                     |                         |                    |                      |                  |  |
|------|--------------|---------------|---------------------|------------|---------------|----------------|----------------|-----------------|-----------------|---------------|----------------|---------------------|----------------|--------------------|-----------------------------|---------------------------|--------------------|---------------------|-------------------------|--------------------|----------------------|------------------|--|
|      |              |               |                     | Firmicutes | Bacteroidetes | Proteobacteria | Actinobacteria | Ruminococcaceae | Lachnospiraceae | Rikenellaceae | Bacteroidaceae | Erysipelotrichaceae | Prevotellaceae | Enterobacteriaceae | <i>Bifidobacterium</i> spp. | <i>Lactobacillus</i> spp. | <i>Allobaculum</i> | <i>Turicibacter</i> | <i>Clostridium</i> spp. | <i>Akkermansia</i> | <i>Oscillibacter</i> | <i>Bilophila</i> |  |
| 26   | Weaning mice | Soy oil       | /                   |            |               |                |                |                 |                 |               |                |                     |                |                    | ↓                           | ↓                         |                    |                     | ↑                       |                    |                      |                  |  |
| 14   | mice         | Soy oil       | /                   |            |               |                |                |                 |                 |               |                |                     |                |                    |                             | ↑                         |                    |                     |                         | ↑                  |                      |                  |  |
| 21   | mice         | n-6           | /                   |            |               |                |                |                 |                 |               |                |                     |                | ↑                  |                             |                           |                    |                     | ↑                       |                    |                      |                  |  |
| 1    | mice         | Safflower oil | /                   |            |               |                |                | ↑               | ↓               | ↓             | ↑              |                     |                |                    | ↑                           |                           | ↑                  |                     |                         |                    | ↑                    |                  |  |
| 3    | mice         | n-6           | /                   |            |               |                |                |                 | ↑               |               |                | ↑                   |                |                    | ↓                           | ↓                         | ↓                  |                     |                         |                    | ↑                    | ↑                |  |
| 4    | mice         | Safflower oil | /                   |            | ↑             |                |                |                 |                 |               |                |                     |                |                    |                             |                           |                    |                     | ↑                       |                    |                      |                  |  |
| 5    | mice         | Safflower oil | /                   | ↑          | ↓             | ↑              | ↑              |                 |                 |               |                |                     |                |                    |                             |                           |                    |                     |                         |                    |                      |                  |  |
| 25   | rats         | High n-6/n-3  | ↑                   |            |               | ↓              |                |                 |                 |               |                |                     |                |                    |                             |                           | ↓                  |                     |                         |                    |                      |                  |  |

/ no significant difference or not analysed; ↑ increase; ↓ decrease

## BIBLIOGRAPHY

1. Patterson, E. *et al.* Impact of dietary fatty acids on metabolic activity and host intestinal microbiota composition in C57BL/6J mice. *Br J Nutr* **111**, 1905–1917 (2014).
2. Shen, W. *et al.* Intestinal and systemic inflammatory responses are positively associated with sulfidogenic bacteria abundance in high-fat-fed male C57BL/6J mice. *J Nutr* **144**, 1181–1187 (2014).
3. Lam, Y. Y. *et al.* Effects of dietary fat profile on gut permeability and microbiota and their relationships with metabolic changes in mice. *Obesity (Silver Spring)* **23**, 1429–1439 (2015).
4. de Wit, N. *et al.* Saturated fat stimulates obesity and hepatic steatosis and affects gut microbiota composition by an enhanced overflow of dietary fat to the distal intestine. *Am J Physiol Gastrointest Liver Physiol* **303**, G589–599 (2012).
5. Huang, E. Y. *et al.* Composition of dietary fat source shapes gut microbiota architecture and alters host inflammatory mediators in mouse adipose tissue. *JPEN J Parenter Enteral Nutr* **37**, 746–754 (2013).
6. Yamada, S. *et al.* Gut microbiota-mediated generation of saturated fatty acids elicits inflammation in the liver in murine high-fat diet-induced steatohepatitis. *BMC Gastroenterol* **17**, 136 (2017).
7. Prieto, I. *et al.* Influence of a diet enriched with virgin olive oil or butter on mouse gut microbiota and its correlation to physiological and biochemical parameters related to metabolic syndrome. *PLoS One* **13**, e0190368 (2018).
8. Just, S. *et al.* The gut microbiota drives the impact of bile acids and fat source in diet on mouse metabolism. *Microbiome* **6**, 134 (2018).
9. Kim, K.-A., Gu, W., Lee, I.-A., Joh, E.-H. & Kim, D.-H. High fat diet-induced gut microbiota exacerbates inflammation and obesity in mice via the TLR4 signaling pathway. *PLoS One* **7**, e47713 (2012).
10. Zhang, C. *et al.* Structural resilience of the gut microbiota in adult mice under high-fat dietary perturbations. *ISME J* **6**, 1848–1857 (2012).
11. Martinez-Guryn, K. *et al.* Small Intestine Microbiota Regulate Host Digestive and Absorptive Adaptive Responses to Dietary Lipids. *Cell Host Microbe* **23**, 458–469.e5 (2018).
12. Liu, C. *et al.* Alterations and structural resilience of the gut microbiota under dietary fat perturbations. *J Nutr Biochem* **61**, 91–100 (2018).
13. Gual-Grau, A., Guirro, M., Mayneris-Perxachs, J., Arola, L. & Boqué, N. Impact of different hypercaloric diets on obesity features in rats: a metagenomics and metabolomics integrative approach. *J Nutr Biochem* **71**, 122–131 (2019).
14. Patrone, V. *et al.* Differential effects of coconut versus soy oil on gut microbiota composition and predicted metabolic function in adult mice. *BMC Genomics* **19**, 808 (2018).
15. Zhou, S. *et al.* Effects of Medium- and Long-Chain Triacylglycerols on Lipid Metabolism and Gut Microbiota Composition in C57BL/6J Mice. *J Agric Food Chem* **65**, 6599–6607 (2017).
16. Djurasevic, S. *et al.* Beneficial Effect of Virgin Coconut Oil on Alloxan-Induced Diabetes and Microbiota Composition in Rats. *Plant Foods Hum Nutr* **73**, 295–301 (2018).
17. Ge, Y. *et al.* Effect of industrial trans-fatty acids-enriched diet on gut microbiota of C57BL/6 mice. *Eur J Nutr* **58**, 2625–2638 (2019).
18. Hua, Y. *et al.* Trans-fatty acids alter the gut microbiota in high-fat-diet-induced obese rats. *Br J Nutr* **124**, 1251–1263 (2020).
19. Hidalgo, M. *et al.* Changes in Gut Microbiota Linked to a Reduction in Systolic Blood Pressure in Spontaneously Hypertensive Rats Fed an Extra Virgin Olive Oil-Enriched Diet. *Plant Foods Hum Nutr* **73**, 1–6 (2018).
20. Mujico, J. R., Baccan, G. C., Gheorghe, A., Díaz, L. E. & Marcos, A. Changes in gut microbiota due to supplemented fatty acids in diet-induced obese mice. *Br J Nutr* **110**, 711–720 (2013).
21. Ghosh, S. *et al.* Fish oil attenuates omega-6 polyunsaturated fatty acid-induced dysbiosis and infectious colitis but impairs LPS dephosphorylation activity causing sepsis. *PLoS One* **8**, e55468 (2013).
22. Yu, H.-N. *et al.* Effects of fish oil with a high content of n-3 polyunsaturated fatty acids on mouse gut microbiota. *Arch Med Res* **45**, 195–202 (2014).

23. Caesar, R., Tremaroli, V., Kovatcheva-Datchary, P., Cani, P. D. & Bäckhed, F. Crosstalk between Gut Microbiota and Dietary Lipids Aggravates WAT Inflammation through TLR Signaling. *Cell Metab* **22**, 658–668 (2015).
24. Robertson, R. C. *et al.* Omega-3 polyunsaturated fatty acids critically regulate behaviour and gut microbiota development in adolescence and adulthood. *Brain Behav Immun* **59**, 21–37 (2017).
25. Lee, H.-C. *et al.* A high linoleic acid diet exacerbates metabolic responses and gut microbiota dysbiosis in obese rats with diabetes mellitus. *Food Funct* **10**, 786–798 (2019).
26. Patrone, V. *et al.* Short-term modifications in the distal gut microbiota of weaning mice induced by a high-fat diet. *Microbiology (Reading)* **158**, 983–992 (2012).
